# Supplementary material for: MncR: Late Integration Machine Learning Model for Classification of ncRNA Classes Using Sequence and Structural Encoding
Source: Int J Mol Sci. 2023 May 17;24(10):8884. doi: 10.3390/ijms24108884 (PMC10218863; doi:10.3390/ijms24108884)
Supplement: Supplementary file 1 [file ijms-24-08884-s001.zip]

Archive with 6 entries (6 files):
- Supplementaries.pdf
- SUPPL_FIG1.tif
- SUPPL_FIG2.tif
- SUPPL_FIG3.tiff
- SUPPL_TABLE1.ods
- SUPPL_TABLE2.ods
