# Supplementary material for: MncR: Late Integration Machine Learning Model for Classification of ncRNA Classes Using Sequence and Structural Encoding
Source: Int J Mol Sci. 2023 May 17;24(10):8884. doi: 10.3390/ijms24108884 (PMC10218863; doi:10.3390/ijms24108884)
Supplement: Supplementary file 1 [file ijms-24-08884-s001.zip › SUPPL_TABLE1.ods]

## Sheet: test_results_-2
sequence_id	rna_type	rna_subtype	length	ncr_dense_pred	structure_encoding_pred	mncr_pred	graph_encoding_pred	sequence_encoding_pred	group
URS0000DF98DB_38772	lncRNA	lncRNA_base	1314	unpredicted	rRNA	rRNA	rRNA	rRNA	1a
URS0000E75E30_230844	lncRNA	lncRNA_base	143	unpredicted	snoRNA	snoRNA	snoRNA	snoRNA	1a
URS0000CC0E90_1868482	lncRNA	lncRNA_base	152	unpredicted	snoRNA	snoRNA	snoRNA	snoRNA	1a
URS0002185D91_9925	lncRNA	lncRNA_base	109	unpredicted	miRNA	miRNA	snRNA	miRNA	1b
URS0000CC18F5_1868482	lncRNA	lncRNA_base	99	unpredicted	snoRNA	miRNA	snoRNA	snoRNA	1b
URS00007180C5_30608	lncRNA	lncRNA_base	108	unpredicted	snoRNA	rRNA	snRNA	miRNA	1b
URS000069EF66_83772	lncRNA	lncRNA_base	114	unpredicted	miRNA	snoRNA	snRNA	miRNA	1b
URS0000BDBC6A_230844	lncRNA	lncRNA_base	75	unpredicted	snoRNA	snoRNA	snoRNA	miRNA	1b
URS0000E81492_452646	lncRNA	lncRNA_base	76	unpredicted	snoRNA	snoRNA	snoRNA	miRNA	1b
URS0000CCDA5A_1868482	lncRNA	lncRNA_base	79	unpredicted	snoRNA	snoRNA	snoRNA	miRNA	1b
URS00006FDECF_10029	lncRNA	lncRNA_base	76	unpredicted	snoRNA	snoRNA	tRNA	miRNA	1b
URS00006CC536_30522	lncRNA	lncRNA_base	168	unpredicted	snRNA	snoRNA	snRNA	snoRNA	1b
URS00008BE1BB_9606	lncRNA	lncRNA_base	212	unpredicted	miRNA	lncRNA	snoRNA	snoRNA	2a
URS000221B9F6_122909	lncRNA	lncRNA_base	1678	unpredicted	rRNA	rRNA	rRNA	lncRNA	2b
URS00019CCF59_506608	lncRNA	lncRNA_base	244	unpredicted	snoRNA	rRNA	rRNA	lncRNA	2b
URS0000DFA9DC_9643	lncRNA	lncRNA_base	157	unpredicted	snoRNA	snRNA	snoRNA	lncRNA	2b
URS0000BD6602_43179	lncRNA	lncRNA_base	152	unpredicted	snoRNA	snoRNA	snRNA	lncRNA	2b
URS0000BD1A8E_230844	lncRNA	lncRNA_base	124	unpredicted	miRNA	snoRNA	snoRNA	lncRNA	2b
URS0000DFCE61_9643	lncRNA	lncRNA_base	137	unpredicted	snoRNA	snoRNA	snoRNA	lncRNA	2b
URS00019D2AC5_506608	lncRNA	lncRNA_base	222	unpredicted	lncRNA	miRNA	snRNA	miRNA	2c
URS0000EF2322_9823	lncRNA	lncRNA_base	167	unpredicted	lncRNA	miRNA	snoRNA	miRNA	2c
URS00021C3751_29158	lncRNA	lncRNA_base	257	unpredicted	lncRNA	miRNA	rRNA	snoRNA	2c
URS000069C19D_9823	lncRNA	lncRNA_base	168	unpredicted	lncRNA	snoRNA	snoRNA	miRNA	2c
URS00006510A8_30522	lncRNA	lncRNA_base	128	unpredicted	snoRNA	snoRNA	lncRNA	miRNA	2d
URS000219744D_29158	lncRNA	lncRNA_base	227	unpredicted	snoRNA	lncRNA	snRNA	lncRNA	3a
URS00021E7D93_29158	lncRNA	lncRNA_base	201	unpredicted	snoRNA	lncRNA	snRNA	lncRNA	3a
URS00021C742D_29158	lncRNA	lncRNA_base	218	unpredicted	snoRNA	lncRNA	snoRNA	lncRNA	3a
URS00003EF4E9_9606	lncRNA	lncRNA_base	250	unpredicted	snoRNA	lncRNA	snoRNA	lncRNA	3a
URS0002223555_122909	lncRNA	lncRNA_base	824	unpredicted	lncRNA	lncRNA	rRNA	rRNA	3b
URS0001D3A075_317549	lncRNA	lncRNA_base	233	unpredicted	lncRNA	lncRNA	snRNA	snRNA	3b
URS00019E6684_506608	lncRNA	lncRNA_base	270	unpredicted	lncRNA	lncRNA	snRNA	snoRNA	3b
URS00008B4AB5_9606	lncRNA	lncRNA_base	268	unpredicted	lncRNA	lncRNA	snoRNA	snoRNA	3b
URS00008119F4_9606	lncRNA	lncRNA_base	207	unpredicted	snoRNA	lncRNA	lncRNA	miRNA	3c
URS0002265003_122909	lncRNA	lncRNA_base	375	unpredicted	snoRNA	lncRNA	lncRNA	rRNA	3c
URS00008B5A0F_9606	lncRNA	lncRNA_base	235	unpredicted	snoRNA	lncRNA	lncRNA	snoRNA	3c
URS000205B82F_317549	lncRNA	lncRNA_base	303	unpredicted	lncRNA	miRNA	miRNA	lncRNA	3d
URS000195BD43_13616	lncRNA	lncRNA_base	508	unpredicted	lncRNA	miRNA	miRNA	lncRNA	3d
URS00021B7FEA_29158	lncRNA	lncRNA_base	571	unpredicted	lncRNA	miRNA	rRNA	lncRNA	3d
URS0000A4CB5D_7227	lncRNA	lncRNA_base	641	unpredicted	lncRNA	rRNA	rRNA	lncRNA	3d
URS0001A20318_74940	lncRNA	lncRNA_base	853	unpredicted	lncRNA	rRNA	rRNA	lncRNA	3d
URS0001F0C5F1_317549	lncRNA	lncRNA_base	308	unpredicted	lncRNA	rRNA	rRNA	lncRNA	3d
URS0001BF5292_9606	lncRNA	lncRNA_base	200	unpredicted	lncRNA	snRNA	snoRNA	lncRNA	3d
URS00019FD15D_506608	lncRNA	lncRNA_base	234	unpredicted	lncRNA	snoRNA	snRNA	lncRNA	3d
URS0001A1CA25_8022	lncRNA	lncRNA_base	984	unpredicted	rRNA	rRNA	lncRNA	lncRNA	3e
URS0000EF23E5_9823	lncRNA	lncRNA_base	146	unpredicted	lncRNA	snoRNA	lncRNA	snoRNA	3f
URS00008B885A_9606	lncRNA	lncRNA_base	206	unpredicted	lncRNA	snoRNA	lncRNA	snoRNA	3f
URS000195B9FA_13616	lncRNA	lncRNA_base	1365	unpredicted	lncRNA	lncRNA	miRNA	lncRNA	4a
URS0000E5DBCB_3880	lncRNA	lncRNA_base	238	unpredicted	lncRNA	lncRNA	miRNA	lncRNA	4a
URS00005E635B_9606	lncRNA	lncRNA_base	286	unpredicted	lncRNA	lncRNA	rRNA	lncRNA	4a
URS00008C436A_10090	lncRNA	lncRNA_base	247	unpredicted	lncRNA	lncRNA	rRNA	lncRNA	4a
URS000196E65E_7994	lncRNA	lncRNA_base	411	unpredicted	lncRNA	lncRNA	rRNA	lncRNA	4a
URS00019F95DD_506608	lncRNA	lncRNA_base	266	unpredicted	lncRNA	lncRNA	rRNA	lncRNA	4a
URS00021DD3B6_158383	lncRNA	lncRNA_base	360	unpredicted	lncRNA	lncRNA	rRNA	lncRNA	4a
URS0002233CBE_122909	lncRNA	lncRNA_base	338	unpredicted	lncRNA	lncRNA	rRNA	lncRNA	4a
URS000196D39A_7994	lncRNA	lncRNA_base	186	unpredicted	lncRNA	lncRNA	snRNA	lncRNA	4a
URS00021D3D4A_29158	lncRNA	lncRNA_base	293	unpredicted	lncRNA	lncRNA	snRNA	lncRNA	4a
URS00009BD486_10090	lncRNA	lncRNA_base	469	unpredicted	lncRNA	lncRNA	snRNA	lncRNA	4a
URS00021923C5_29158	lncRNA	lncRNA_base	210	unpredicted	lncRNA	lncRNA	snRNA	lncRNA	4a
URS000069709B_10020	lncRNA	lncRNA_base	197	unpredicted	lncRNA	lncRNA	snRNA	lncRNA	4a
URS0000BC8FA5_10029	lncRNA	lncRNA_base	208	unpredicted	lncRNA	lncRNA	snRNA	lncRNA	4a
URS0000BD4159_10141	lncRNA	lncRNA_base	327	unpredicted	lncRNA	lncRNA	snoRNA	lncRNA	4a
URS00008C28C6_9606	lncRNA	lncRNA_base	292	unpredicted	lncRNA	lncRNA	snoRNA	lncRNA	4a
URS0000E9893F_9606	lncRNA	lncRNA_base	296	unpredicted	lncRNA	lncRNA	snoRNA	lncRNA	4a
URS00021CBBF1_29158	lncRNA	lncRNA_base	202	unpredicted	lncRNA	lncRNA	snoRNA	lncRNA	4a
URS0001F95721_317549	lncRNA	lncRNA_base	204	unpredicted	lncRNA	lncRNA	snoRNA	lncRNA	4a
URS000194DA33_13616	lncRNA	lncRNA_base	1006	unpredicted	rRNA	lncRNA	lncRNA	lncRNA	4b
URS0000C9705C_4232	lncRNA	lncRNA_base	773	unpredicted	rRNA	lncRNA	lncRNA	lncRNA	4b
URS0000B26E8D_9913	lncRNA	lncRNA_base	207	unpredicted	snRNA	lncRNA	lncRNA	lncRNA	4b
URS00008B7D9C_9606	lncRNA	lncRNA_base	227	unpredicted	snoRNA	lncRNA	lncRNA	lncRNA	4b
URS00019700EA_13616	lncRNA	lncRNA_base	224	unpredicted	snoRNA	lncRNA	lncRNA	lncRNA	4b
URS0000BDD48E_10141	lncRNA	lncRNA_base	212	unpredicted	snoRNA	lncRNA	lncRNA	lncRNA	4b
URS00021E7F4E_158383	lncRNA	lncRNA_base	233	unpredicted	snoRNA	lncRNA	lncRNA	lncRNA	4b
URS0000BCB8E5_885580	lncRNA	lncRNA_base	219	unpredicted	snoRNA	lncRNA	lncRNA	lncRNA	4b
URS00006D3CE5_39432	lncRNA	lncRNA_base	150	unpredicted	snoRNA	lncRNA	lncRNA	lncRNA	4b
URS00009C5C95_10090	lncRNA	lncRNA_base	345	unpredicted	snoRNA	lncRNA	lncRNA	lncRNA	4b
URS0000E7AB25_96440	lncRNA	lncRNA_base	197	unpredicted	lncRNA	lncRNA	lncRNA	miRNA	4c
URS00021A5819_29158	lncRNA	lncRNA_base	229	unpredicted	lncRNA	lncRNA	lncRNA	miRNA	4c
URS0002186F14_9925	lncRNA	lncRNA_base	3013	unpredicted	lncRNA	lncRNA	lncRNA	rRNA	4c
URS00021F50D0_28377	lncRNA	lncRNA_base	3308	unpredicted	lncRNA	lncRNA	lncRNA	rRNA	4c
URS00007E6875_7227	lncRNA	lncRNA_base	3175	unpredicted	lncRNA	lncRNA	lncRNA	rRNA	4c
URS00003838BB_7227	lncRNA	lncRNA_base	2230	unpredicted	lncRNA	lncRNA	lncRNA	rRNA	4c
URS00008B4370_9606	lncRNA	lncRNA_base	256	unpredicted	lncRNA	miRNA	lncRNA	lncRNA	4d
URS0001FAB32A_317549	lncRNA	lncRNA_base	1043	unpredicted	lncRNA	rRNA	lncRNA	lncRNA	4d
URS0001D65470_9606	lncRNA	lncRNA_base	772	unpredicted	lncRNA	rRNA	lncRNA	lncRNA	4d
URS00021C4674_29158	lncRNA	lncRNA_base	209	unpredicted	lncRNA	snoRNA	lncRNA	lncRNA	4d
URS0000D61A87_37293	lncRNA	lncRNA_base	1007	unpredicted	lncRNA	snoRNA	lncRNA	lncRNA	4d
URS00021D6BD8_29158	lncRNA	lncRNA_base	280	unpredicted	lncRNA	snoRNA	lncRNA	lncRNA	4d
URS0000CCE3DE_10116	miRNA	premiRNA	1024	unpredicted	lncRNA	lncRNA	lncRNA	lncRNA	1a
URS0000D4F48A_3880	miRNA	premiRNA	159	Other	snoRNA	snoRNA	snoRNA	snoRNA	1a
URS0001BC1431_30608	miRNA	premiRNA	94	Other	snoRNA	snoRNA	snoRNA	snoRNA	1a
URS0000D56BA1_3329	miRNA	premiRNA	229	snoRNA	lncRNA	snoRNA	rRNA	snoRNA	1b
URS0000D519ED_34305	miRNA	premiRNA	245	snoRNA	lncRNA	lncRNA	lncRNA	miRNA	2b
URS00007E3FE7_3847	miRNA	premiRNA	170	Other	lncRNA	lncRNA	snRNA	miRNA	2b
URS00019B0ACB_9995	miRNA	premiRNA	100	miRNA	snoRNA	snoRNA	snRNA	miRNA	2b
URS0000C05000_9402	miRNA	premiRNA	79	miRNA	snoRNA	snoRNA	snRNA	miRNA	2b
URS000068C372_9483	miRNA	premiRNA	69	miRNA	snoRNA	snoRNA	snoRNA	miRNA	2b
URS000065E963_10090	miRNA	premiRNA	95	Other	snoRNA	snoRNA	snoRNA	miRNA	2b
URS00008FFA5C_3694	miRNA	premiRNA	122	miRNA	snoRNA	snoRNA	snoRNA	miRNA	2b
URS0000EFCD37_9305	miRNA	premiRNA	121	miRNA	snoRNA	snoRNA	snoRNA	miRNA	2b
URS0000C3BB7D_419612	miRNA	premiRNA	79	miRNA	snoRNA	snoRNA	tRNA	miRNA	2b
URS00007E40CD_3847	miRNA	premiRNA	212	snoRNA	miRNA	lncRNA	lncRNA	lncRNA	2c
URS0000C5E303_9595	miRNA	premiRNA	277	Other	miRNA	lncRNA	lncRNA	lncRNA	2c
URS00019BAA71_9995	miRNA	premiRNA	97	snoRNA	snoRNA	snoRNA	miRNA	snoRNA	2d
URS0001BC1FC1_9913	miRNA	premiRNA	95	Other	snoRNA	miRNA	snoRNA	miRNA	3a
URS0000D9D2D5_56216	miRNA	premiRNA	81	miRNA	snoRNA	miRNA	snoRNA	miRNA	3a
URS000021D924_9940	miRNA	premiRNA	105	miRNA	snoRNA	miRNA	snoRNA	miRNA	3a
URS0000A76FE4_3702	miRNA	premiRNA	198	miRNA	miRNA	miRNA	snoRNA	lncRNA	3b
URS000075ABE6_7091	miRNA	premiRNA	129	Other	miRNA	miRNA	rRNA	snoRNA	3b
URS0000627F5C_10116	miRNA	premiRNA	107	miRNA	miRNA	miRNA	snRNA	snoRNA	3b
URS000069E7D9_10090	miRNA	premiRNA	119	miRNA	miRNA	miRNA	snoRNA	snoRNA	3b
URS0000C4B62B_8469	miRNA	premiRNA	106	miRNA	lncRNA	miRNA	miRNA	snoRNA	3c
URS0000950615_3694	miRNA	premiRNA	92	miRNA	miRNA	snoRNA	snRNA	miRNA	3d
URS0000BF7305_3635	miRNA	premiRNA	175	miRNA	miRNA	snoRNA	snRNA	miRNA	3d
URS000075BB1F_9600	miRNA	premiRNA	85	miRNA	miRNA	snoRNA	snoRNA	miRNA	3d
URS0000EFC720_225164	miRNA	premiRNA	123	Other	miRNA	snoRNA	snoRNA	miRNA	3d
URS0000D552E0_4565	miRNA	premiRNA	217	miRNA	miRNA	snoRNA	snoRNA	miRNA	3d
URS0000D4F41E_3983	miRNA	premiRNA	121	miRNA	miRNA	snRNA	miRNA	snoRNA	3f
URS0000A90C60_9669	miRNA	premiRNA	111	miRNA	miRNA	snoRNA	miRNA	snoRNA	3f
URS00009AA4E2_3694	miRNA	premiRNA	143	miRNA	miRNA	miRNA	lncRNA	miRNA	4a
URS000069B562_7091	miRNA	premiRNA	117	miRNA	miRNA	miRNA	snRNA	miRNA	4a
URS000075DECD_7091	miRNA	premiRNA	111	miRNA	miRNA	miRNA	snRNA	miRNA	4a
URS0000D56438_3659	miRNA	premiRNA	108	miRNA	miRNA	miRNA	snRNA	miRNA	4a
URS00006B0A43_39946	miRNA	premiRNA	206	miRNA	miRNA	miRNA	snoRNA	miRNA	4a
URS0000A80693_9600	miRNA	premiRNA	97	snoRNA	miRNA	miRNA	snoRNA	miRNA	4a
URS00019AC325_9995	miRNA	premiRNA	103	miRNA	miRNA	miRNA	snoRNA	miRNA	4a
URS0000699549_9601	miRNA	premiRNA	94	snoRNA	miRNA	miRNA	snoRNA	miRNA	4a
URS0000C10810_4565	miRNA	premiRNA	176	snoRNA	miRNA	miRNA	snoRNA	miRNA	4a
URS000099BC27_9646	miRNA	premiRNA	103	miRNA	miRNA	miRNA	snoRNA	miRNA	4a
URS00006A58F6_10116	miRNA	premiRNA	94	miRNA	miRNA	miRNA	snoRNA	miRNA	4a
URS00019BBCCC_9995	miRNA	premiRNA	101	miRNA	miRNA	miRNA	snoRNA	miRNA	4a
URS0000D5125C_8128	miRNA	premiRNA	63	miRNA	miRNA	miRNA	snoRNA	miRNA	4a
URS0000C6086B_225400	miRNA	premiRNA	82	miRNA	miRNA	miRNA	snoRNA	miRNA	4a
URS00009CAA01_79200	miRNA	premiRNA	162	rRNA	miRNA	miRNA	snoRNA	miRNA	4a
URS0001A0CA7E_9995	miRNA	premiRNA	89	miRNA	miRNA	miRNA	snoRNA	miRNA	4a
URS0000EFEF83_9615	miRNA	premiRNA	118	miRNA	miRNA	miRNA	snoRNA	miRNA	4a
URS00019E8BF1_9995	miRNA	premiRNA	104	miRNA	miRNA	miRNA	snoRNA	miRNA	4a
URS0000C42E07_3694	miRNA	premiRNA	133	miRNA	miRNA	miRNA	snoRNA	miRNA	4a
URS0000C3A06E_225400	miRNA	premiRNA	119	miRNA	miRNA	miRNA	snoRNA	miRNA	4a
URS0000B2061E_654	miRNA	premiRNA	96	snoRNA	miRNA	miRNA	snoRNA	miRNA	4a
URS0000D4F249_6289	miRNA	premiRNA	104	miRNA	miRNA	miRNA	tRNA	miRNA	4a
URS00006E7462_7091	miRNA	premiRNA	119	Other	snRNA	miRNA	miRNA	miRNA	4b
URS0000EF8E55_113334	miRNA	premiRNA	77	snoRNA	snoRNA	miRNA	miRNA	miRNA	4b
URS000062FEFD_9483	miRNA	premiRNA	72	snoRNA	snoRNA	miRNA	miRNA	miRNA	4b
URS00006EE865_9606	miRNA	premiRNA	87	snoRNA	snoRNA	miRNA	miRNA	miRNA	4b
URS0000AAC181_9600	miRNA	premiRNA	66	miRNA	snoRNA	miRNA	miRNA	miRNA	4b
URS0000679DFA_10116	miRNA	premiRNA	112	miRNA	snoRNA	miRNA	miRNA	miRNA	4b
URS00006B0957_10116	miRNA	premiRNA	117	miRNA	snoRNA	miRNA	miRNA	miRNA	4b
URS0000AA1C2A_9601	miRNA	premiRNA	107	Other	snoRNA	miRNA	miRNA	miRNA	4b
URS0000D4FDDD_29730	miRNA	premiRNA	213	miRNA	miRNA	miRNA	miRNA	lncRNA	4c
URS0000D52980_3750	miRNA	premiRNA	207	miRNA	miRNA	miRNA	miRNA	lncRNA	4c
URS00007E4395_3847	miRNA	premiRNA	222	Other	miRNA	miRNA	miRNA	lncRNA	4c
URS0000A767F2_3702	miRNA	premiRNA	195	miRNA	miRNA	miRNA	miRNA	lncRNA	4c
URS000075AA9C_10116	miRNA	premiRNA	120	miRNA	miRNA	miRNA	miRNA	lncRNA	4c
URS0000D5594D_101020	miRNA	premiRNA	153	miRNA	miRNA	miRNA	miRNA	lncRNA	4c
URS0000411052_39946	miRNA	premiRNA	182	miRNA	miRNA	miRNA	miRNA	lncRNA	4c
URS0000EFE1E5_9371	miRNA	premiRNA	119	miRNA	miRNA	miRNA	miRNA	rRNA	4c
URS00006BFF55_3760	miRNA	premiRNA	152	miRNA	miRNA	miRNA	miRNA	rRNA	4c
URS0000D52D12_29730	miRNA	premiRNA	91	miRNA	miRNA	miRNA	miRNA	snRNA	4c
URS0000EFBDCF_8932	miRNA	premiRNA	120	miRNA	miRNA	miRNA	miRNA	snRNA	4c
URS0000EF9B54_27923	miRNA	premiRNA	147	miRNA	miRNA	miRNA	miRNA	snRNA	4c
URS00006F75B8_9483	miRNA	premiRNA	221	Other	miRNA	miRNA	miRNA	snRNA	4c
URS0000C7D8FA_214687	miRNA	premiRNA	113	rRNA	miRNA	miRNA	miRNA	snoRNA	4c
URS0000D55F58_3641	miRNA	premiRNA	120	miRNA	miRNA	miRNA	miRNA	snoRNA	4c
URS00006D0AAC_9823	miRNA	premiRNA	82	miRNA	miRNA	miRNA	miRNA	snoRNA	4c
URS0000D4FC65_3329	miRNA	premiRNA	117	miRNA	miRNA	miRNA	miRNA	snoRNA	4c
URS00006136D3_6239	miRNA	premiRNA	110	miRNA	miRNA	miRNA	miRNA	snoRNA	4c
URS0000639F0E_61853	miRNA	premiRNA	183	Other	miRNA	miRNA	miRNA	snoRNA	4c
URS0000C2BC4A_112509	miRNA	premiRNA	124	snoRNA	miRNA	miRNA	miRNA	snoRNA	4c
URS000075BAAC_7955	miRNA	premiRNA	114	snoRNA	miRNA	miRNA	miRNA	snoRNA	4c
URS0000D722F7_210143	miRNA	premiRNA	151	snoRNA	miRNA	miRNA	miRNA	snoRNA	4c
URS0000C0A52F_4565	miRNA	premiRNA	108	snoRNA	miRNA	miRNA	miRNA	snoRNA	4c
URS0000CC4298_9597	miRNA	premiRNA	76	snoRNA	miRNA	miRNA	miRNA	snoRNA	4c
URS000075B039_4577	miRNA	premiRNA	136	snoRNA	miRNA	miRNA	miRNA	snoRNA	4c
URS000075D5D4_9606	miRNA	premiRNA	78	miRNA	miRNA	miRNA	miRNA	snoRNA	4c
URS0000EF7E44_139649	miRNA	premiRNA	132	snoRNA	miRNA	miRNA	miRNA	snoRNA	4c
URS00006513E0_4538	miRNA	premiRNA	272	miRNA	miRNA	miRNA	miRNA	snoRNA	4c
URS000075ED5C_10090	miRNA	premiRNA	136	snoRNA	miRNA	miRNA	miRNA	snoRNA	4c
URS0000EFC442_8364	miRNA	premiRNA	124	snoRNA	miRNA	miRNA	miRNA	snoRNA	4c
URS0000D73E2C_4232	miRNA	premiRNA	102	snoRNA	miRNA	miRNA	miRNA	snoRNA	4c
URS0000EFBC0C_9031	miRNA	premiRNA	121	snoRNA	miRNA	miRNA	miRNA	snoRNA	4c
URS0000D51FE1_119951	miRNA	premiRNA	128	miRNA	miRNA	miRNA	miRNA	snoRNA	4c
URS0000D54EC2_51655	miRNA	premiRNA	103	miRNA	miRNA	miRNA	miRNA	snoRNA	4c
URS0000C7F1C6_407821	miRNA	premiRNA	86	miRNA	miRNA	miRNA	miRNA	snoRNA	4c
URS0000D5150A_51655	miRNA	premiRNA	84	Other	miRNA	miRNA	miRNA	snoRNA	4c
URS0000374B58_39946	miRNA	premiRNA	140	Other	miRNA	miRNA	miRNA	snoRNA	4c
URS0000E00DB9_55149	miRNA	premiRNA	110	miRNA	miRNA	miRNA	miRNA	snoRNA	4c
URS0000C692DE_8496	miRNA	premiRNA	144	snoRNA	miRNA	miRNA	miRNA	snoRNA	4c
URS000075EC31_10096	miRNA	premiRNA	67	miRNA	miRNA	miRNA	miRNA	snoRNA	4c
URS00019A2626_85681	miRNA	premiRNA	101	miRNA	miRNA	miRNA	miRNA	snoRNA	4c
URS000042CE40_7237	miRNA	premiRNA	84	miRNA	miRNA	miRNA	miRNA	tRNA	4c
URS0000C68EA2_51028	miRNA	premiRNA	74	miRNA	miRNA	miRNA	miRNA	tRNA	4c
URS000075C9C5_3847	miRNA	premiRNA	150	snoRNA	miRNA	snoRNA	miRNA	miRNA	4d
URS00006C03CF_109478	miRNA	premiRNA	88	miRNA	miRNA	snoRNA	miRNA	miRNA	4d
URS00006EF88B_246437	miRNA	premiRNA	68	miRNA	miRNA	snoRNA	miRNA	miRNA	4d
URS0002187449_50452	rRNA	5S	125	snoRNA	snoRNA	miRNA	snRNA	miRNA	1b
URS00006B1891_88036	rRNA	58S	154	unpredicted	snRNA	rRNA	lncRNA	lncRNA	2a
URS00022446CB_2653809	rRNA	mt	1267	unpredicted	lncRNA	lncRNA	lncRNA	rRNA	2b
URS00001AE40F_77133	rRNA	SSU	1261	unpredicted	rRNA	lncRNA	lncRNA	lncRNA	2c
URS0000EFFF7A_556037	rRNA	5S	141	snoRNA	rRNA	snoRNA	snRNA	snoRNA	2c
URS000016EBC3_51031	rRNA	28S	421	unpredicted	lncRNA	lncRNA	rRNA	lncRNA	2d
URS0000088B19_1353785	rRNA	SSU	390	unpredicted	lncRNA	lncRNA	rRNA	snoRNA	2d
URS00004EF88D_560203	rRNA	58S	155	rRNA	lncRNA	rRNA	miRNA	rRNA	3a
URS0000E73F07_51338	rRNA	58S	148	rRNA	lncRNA	rRNA	miRNA	rRNA	3a
URS00006A7C20_9365	rRNA	5S	123	rRNA	miRNA	rRNA	snoRNA	rRNA	3a
URS0000C35B12_7918	rRNA	5S	112	rRNA	rRNA	rRNA	lncRNA	miRNA	3b
URS000009CB84_150797	rRNA	58S	818	unpredicted	rRNA	lncRNA	lncRNA	rRNA	3d
URS0002178184_175245	rRNA	28S	350	unpredicted	rRNA	lncRNA	snoRNA	rRNA	3d
URS00002837BE_56994	rRNA	58S	126	miRNA	rRNA	snoRNA	snoRNA	rRNA	3d
URS0000815DE1_1454013	rRNA	28S	553	unpredicted	lncRNA	lncRNA	rRNA	rRNA	3e
URS0001179087_5742	rRNA	58S	154	rRNA	snoRNA	miRNA	rRNA	rRNA	3e
URS0000D7E0A7_3916	rRNA	58S	126	miRNA	snoRNA	snoRNA	rRNA	rRNA	3e
URS0000043C06_4567	rRNA	mt	3467	unpredicted	rRNA	rRNA	lncRNA	rRNA	4a
URS0000A8093F_9940	rRNA	58S	141	rRNA	rRNA	rRNA	lncRNA	rRNA	4a
URS00002A44A7_1075158	rRNA	mt	762	unpredicted	rRNA	rRNA	lncRNA	rRNA	4a
URS000226BBF0_478253	rRNA	mt	898	unpredicted	rRNA	rRNA	lncRNA	rRNA	4a
URS000219E896_158019	rRNA	5S	97	miRNA	rRNA	rRNA	miRNA	rRNA	4a
URS0001980B1D_6945	rRNA	58S	201	rRNA	rRNA	rRNA	miRNA	rRNA	4a
URS0000C63BFB_225164	rRNA	58S	119	rRNA	rRNA	rRNA	snRNA	rRNA	4a
URS0000D7EB45_3330	rRNA	5S	114	rRNA	rRNA	rRNA	snRNA	rRNA	4a
URS0000D21BE3_34087	rRNA	5S	120	Other	rRNA	rRNA	snRNA	rRNA	4a
URS0000274481_33649	rRNA	58S	159	rRNA	rRNA	rRNA	snRNA	rRNA	4a
URS0000DAD78A_3330	rRNA	5S	121	rRNA	rRNA	rRNA	snoRNA	rRNA	4a
URS0000C4DE49_2052152	rRNA	5S	106	rRNA	rRNA	rRNA	snoRNA	rRNA	4a
URS0000BD60A7_34839	rRNA	5S	112	rRNA	rRNA	rRNA	snoRNA	rRNA	4a
URS0000D86A81_3330	rRNA	5S	119	rRNA	rRNA	rRNA	snoRNA	rRNA	4a
URS0000218AE0_670800	rRNA	58S	158	rRNA	rRNA	rRNA	snoRNA	rRNA	4a
URS0000DB932B_409849	rRNA	5S	118	rRNA	rRNA	rRNA	snoRNA	rRNA	4a
URS0000BDC476_10093	rRNA	5S	103	rRNA	rRNA	rRNA	snoRNA	rRNA	4a
URS0000601568_105222	rRNA	58S	184	rRNA	rRNA	rRNA	snoRNA	rRNA	4a
URS00021431A2_7757	rRNA	28S	3048	unpredicted	lncRNA	rRNA	rRNA	rRNA	4b
URS0002152CC8_175245	rRNA	28S	361	unpredicted	lncRNA	rRNA	rRNA	rRNA	4b
URS000212E724_234915	rRNA	28S	477	unpredicted	lncRNA	rRNA	rRNA	rRNA	4b
URS000213E2B9_175245	rRNA	28S	344	unpredicted	lncRNA	rRNA	rRNA	rRNA	4b
URS0000D1FE80_910372	rRNA	mt	820	unpredicted	lncRNA	rRNA	rRNA	rRNA	4b
URS000215BAEF_175245	rRNA	28S	388	unpredicted	lncRNA	rRNA	rRNA	rRNA	4b
URS0000831178_1461025	rRNA	58S	187	Other	lncRNA	rRNA	rRNA	rRNA	4b
URS0001B60E4F_3711	rRNA	SSU	1187	unpredicted	lncRNA	rRNA	rRNA	rRNA	4b
URS000038ADBE_272940	rRNA	mt	1359	unpredicted	lncRNA	rRNA	rRNA	rRNA	4b
URS000070B3A6_28377	rRNA	5S	119	rRNA	miRNA	rRNA	rRNA	rRNA	4b
URS0000964728_559298	rRNA	25S	3362	unpredicted	rRNA	rRNA	rRNA	lncRNA	4c
URS00006E64CF_6945	rRNA	58S	114	miRNA	rRNA	rRNA	rRNA	miRNA	4c
URS00021C5BFB_158019	rRNA	5S	111	rRNA	rRNA	rRNA	rRNA	snoRNA	4c
URS00004962E6_241622	rRNA	28S	1442	unpredicted	rRNA	lncRNA	rRNA	rRNA	4d
URS0000DD5224_1517492	rRNA	mt	674	unpredicted	rRNA	lncRNA	rRNA	rRNA	4d
URS0001BD64CC_9606	snRNA	snRNA_base	3846	unpredicted	lncRNA	lncRNA	lncRNA	lncRNA	1a
URS0000CAA3E5_6192	snRNA	snRNA_base	195	unpredicted	lncRNA	lncRNA	rRNA	lncRNA	1b
URS000196C5A0_9823	snRNA	snRNA_base	369	unpredicted	lncRNA	lncRNA	rRNA	lncRNA	1b
URS00002C7FDD_10029	snRNA	snRNA_base	124	unpredicted	miRNA	snoRNA	snoRNA	snoRNA	1b
URS000062BD1A_9258	snRNA	snRNA_base	86	unpredicted	lncRNA	snRNA	snoRNA	miRNA	2a
URS0000C7F3E1_37653	snRNA	snRNA_base	115	unpredicted	miRNA	miRNA	miRNA	snRNA	2b
URS0000D79B7D_121845	snRNA	snRNA_base	193	unpredicted	lncRNA	snoRNA	lncRNA	snRNA	2b
URS0000D9AF66_4096	snRNA	snRNA_base	102	unpredicted	snoRNA	miRNA	snRNA	miRNA	2d
URS0000D8E8A8_37546	snRNA	snRNA_base	120	unpredicted	miRNA	snRNA	snoRNA	snRNA	3a
URS0000EF1E74_29139	snRNA	snRNA_base	158	unpredicted	snRNA	snRNA	snoRNA	lncRNA	3b
URS0000A52A95_3821	snRNA	snRNA_base	196	unpredicted	snRNA	snRNA	snoRNA	lncRNA	3b
URS0000C451EC_1305764	snRNA	snRNA_base	210	unpredicted	snRNA	snRNA	snoRNA	miRNA	3b
URS0001BC5859_278021	snRNA	snRNA_base	190	unpredicted	snRNA	snRNA	snoRNA	snoRNA	3b
URS00005A8181_10029	snRNA	snRNA_base	161	unpredicted	lncRNA	snRNA	snRNA	lncRNA	3c
URS0000E3D5D5_291195	snRNA	snRNA_base	182	unpredicted	snoRNA	snRNA	snRNA	lncRNA	3c
URS00021A56AC_158383	snRNA	snRNA_base	147	unpredicted	snoRNA	snRNA	snRNA	miRNA	3c
URS0000BD7E5C_34839	snRNA	snRNA_base	93	unpredicted	snoRNA	snRNA	snRNA	miRNA	3c
URS0000647D67_9483	snRNA	snRNA_base	129	unpredicted	snoRNA	snRNA	snRNA	snoRNA	3c
URS0000D9A824_121845	snRNA	snRNA_base	200	unpredicted	snRNA	lncRNA	snoRNA	snRNA	3d
URS000070BB44_4113	snRNA	snRNA_base	61	unpredicted	snRNA	miRNA	miRNA	snRNA	3d
URS0000C48DA4_81985	snRNA	snRNA_base	117	unpredicted	snRNA	snoRNA	snoRNA	snRNA	3d
URS0000D82383_4072	snRNA	snRNA_base	199	unpredicted	lncRNA	miRNA	snRNA	snRNA	3e
URS0000D957B3_3656	snRNA	snRNA_base	70	unpredicted	snoRNA	miRNA	snRNA	snRNA	3e
URS0000E7D641_9999	snRNA	snRNA_base	111	unpredicted	lncRNA	rRNA	snRNA	snRNA	3e
URS0000A823ED_9371	snRNA	snRNA_base	135	unpredicted	snoRNA	snoRNA	snRNA	snRNA	3e
URS00006B4029_9615	snRNA	snRNA_base	276	unpredicted	snRNA	snRNA	lncRNA	snRNA	4a
URS0000BFBBA7_4577	snRNA	snRNA_base	197	unpredicted	snRNA	snRNA	lncRNA	snRNA	4a
URS00006BEC1E_10181	snRNA	snRNA_base	194	unpredicted	snRNA	snRNA	lncRNA	snRNA	4a
URS000198A978_2587831	snRNA	snRNA_base	163	unpredicted	snRNA	snRNA	lncRNA	snRNA	4a
URS0000E69A9B_8996	snRNA	snRNA_base	126	unpredicted	snRNA	snRNA	miRNA	snRNA	4a
URS0000AA9865_9361	snRNA	snRNA_base	159	unpredicted	snRNA	snRNA	miRNA	snRNA	4a
URS0000C5DBE8_109376	snRNA	snRNA_base	117	unpredicted	snRNA	snRNA	miRNA	snRNA	4a
URS0000BEA2AA_6186	snRNA	snRNA_base	167	unpredicted	snRNA	snRNA	rRNA	snRNA	4a
URS000062FC67_4113	snRNA	snRNA_base	157	unpredicted	snRNA	snRNA	rRNA	snRNA	4a
URS0000C2FFE3_9233	snRNA	snRNA_base	120	unpredicted	snRNA	snRNA	snoRNA	snRNA	4a
URS0000D914B5_282301	snRNA	snRNA_base	169	unpredicted	snRNA	snRNA	snoRNA	snRNA	4a
URS0002184FCF_9704	snRNA	snRNA_base	256	unpredicted	snRNA	snRNA	snoRNA	snRNA	4a
URS000064236A_9978	snRNA	snRNA_base	120	unpredicted	snRNA	snRNA	snoRNA	snRNA	4a
URS0000EF1D98_591936	snRNA	snRNA_base	139	unpredicted	snRNA	snRNA	snoRNA	snRNA	4a
URS000198E6E7_61221	snRNA	snRNA_base	121	unpredicted	snRNA	snRNA	snoRNA	snRNA	4a
URS0000C5FF54_37653	snRNA	snRNA_base	113	unpredicted	snRNA	snRNA	snoRNA	snRNA	4a
URS00006F304E_10029	snRNA	snRNA_base	143	unpredicted	snRNA	snRNA	snoRNA	snRNA	4a
URS0000BCA7A3_10093	snRNA	snRNA_base	158	unpredicted	snRNA	snRNA	snoRNA	snRNA	4a
URS000072A770_10116	snRNA	snRNA_base	140	unpredicted	snRNA	snRNA	snoRNA	snRNA	4a
URS0000708986_7897	snRNA	snRNA_base	159	unpredicted	snRNA	snRNA	snoRNA	snRNA	4a
URS0001BBEEB6_79327	snRNA	snRNA_base	190	unpredicted	snRNA	snRNA	snoRNA	snRNA	4a
URS00006B110C_10090	snRNA	snRNA_base	180	unpredicted	snRNA	snRNA	snoRNA	snRNA	4a
URS000198C6F2_8030	snRNA	snRNA_base	116	unpredicted	snRNA	snRNA	snoRNA	snRNA	4a
URS0002182044_9704	snRNA	snRNA_base	136	unpredicted	snRNA	snRNA	snoRNA	snRNA	4a
URS0001988320_8032	snRNA	snRNA_base	117	unpredicted	snRNA	snRNA	snoRNA	snRNA	4a
URS0000A9F90F_13735	snRNA	snRNA_base	169	unpredicted	snRNA	snRNA	snoRNA	snRNA	4a
URS0000C10E85_29729	snRNA	snRNA_base	174	unpredicted	snRNA	snRNA	snoRNA	snRNA	4a
URS0000C5F254_157069	snRNA	snRNA_base	121	unpredicted	snRNA	snRNA	snoRNA	snRNA	4a
URS0000AA1E6E_9555	snRNA	snRNA_base	105	unpredicted	snRNA	snRNA	snoRNA	snRNA	4a
URS0000C6C158_70667	snRNA	snRNA_base	120	unpredicted	snRNA	snRNA	snoRNA	snRNA	4a
URS0000C77C0D_13333	snRNA	snRNA_base	132	unpredicted	snRNA	snRNA	snoRNA	snRNA	4a
URS0000E642F4_51338	snRNA	snRNA_base	185	unpredicted	snRNA	snRNA	snoRNA	snRNA	4a
URS0000635387_9483	snRNA	snRNA_base	117	unpredicted	snRNA	snRNA	snoRNA	snRNA	4a
URS0000BD342F_79684	snRNA	snRNA_base	111	unpredicted	snoRNA	snRNA	snRNA	snRNA	4b
URS0000C24A9B_27848	snRNA	snRNA_base	149	unpredicted	snoRNA	snRNA	snRNA	snRNA	4b
URS00006A4FA0_9544	snRNA	snRNA_base	134	unpredicted	snoRNA	snRNA	snRNA	snRNA	4b
URS0000DFAACC_29073	snRNA	snRNA_base	107	unpredicted	snoRNA	snRNA	snRNA	snRNA	4b
URS000062C1B4_28377	snRNA	snRNA_base	108	unpredicted	snoRNA	snRNA	snRNA	snRNA	4b
URS0000BD4E70_34839	snRNA	snRNA_base	147	unpredicted	snoRNA	snRNA	snRNA	snRNA	4b
URS0001996458_68415	snRNA	snRNA_base	95	unpredicted	snoRNA	snRNA	snRNA	snRNA	4b
URS0000A7F43D_30522	snRNA	snRNA_base	123	unpredicted	snoRNA	snRNA	snRNA	snRNA	4b
URS0000BCFDA1_10036	snRNA	snRNA_base	103	unpredicted	snoRNA	snRNA	snRNA	snRNA	4b
URS0000C1AECA_27848	snRNA	snRNA_base	192	unpredicted	snRNA	snRNA	snRNA	lncRNA	4c
URS0000C632AD_77586	snRNA	snRNA_base	89	unpredicted	snRNA	snRNA	snRNA	miRNA	4c
URS0000C55912_1036808	snRNA	snRNA_base	187	unpredicted	snRNA	snRNA	snRNA	miRNA	4c
URS0000C5BF84_7918	snRNA	snRNA_base	115	unpredicted	snRNA	snRNA	snRNA	miRNA	4c
URS0000BE73F1_4577	snRNA	snRNA_base	204	unpredicted	snRNA	snRNA	snRNA	miRNA	4c
URS0000E01B08_8508	snRNA	snRNA_base	147	unpredicted	snRNA	snRNA	snRNA	snoRNA	4c
URS0000C8135E_885580	snRNA	snRNA_base	105	unpredicted	snRNA	snRNA	snRNA	snoRNA	4c
URS0000C636D2_765440	snRNA	snRNA_base	187	unpredicted	snRNA	snoRNA	snRNA	snRNA	4d
URS000070038F_9669	snRNA	snRNA_base	132	unpredicted	snRNA	snoRNA	snRNA	snRNA	4d
URS0000E09EA0_3880	snoRNA	CD	239	Other	lncRNA	lncRNA	lncRNA	lncRNA	1a
URS0000C0ABA7_109478	snoRNA	HACA	213	miRNA	lncRNA	lncRNA	rRNA	lncRNA	1b
URS0000405EF4_4932	snoRNA	HACA	205	Other	lncRNA	lncRNA	snRNA	lncRNA	1b
URS0000D9DE5B_1789683	snoRNA	HACA	201	snoRNA	lncRNA	miRNA	snRNA	lncRNA	1b
URS0000DA8049_3330	snoRNA	HACA	60	tRNA	miRNA	tRNA	tRNA	miRNA	1b
URS00006C9B51_8478	snoRNA	HACA	63	Other	miRNA	tRNA	tRNA	miRNA	1b
URS000000F6AD_39947	snoRNA	CD	137	miRNA	lncRNA	snoRNA	snRNA	miRNA	2a
URS0000CC05C9_1868482	snoRNA	HACA	117	snoRNA	snRNA	snoRNA	snRNA	miRNA	2a
URS0000C5ACB2_9823	snoRNA	CD	64	miRNA	miRNA	snoRNA	tRNA	miRNA	2a
URS000071D582_3988	snoRNA	CD	107	miRNA	miRNA	miRNA	miRNA	snoRNA	2b
URS0000A78963_30538	snoRNA	HACA	130	snoRNA	snoRNA	miRNA	lncRNA	miRNA	2c
URS0000DB5FA2_10020	snoRNA	HACA	126	snoRNA	snoRNA	miRNA	miRNA	miRNA	2c
URS0000C4D7CC_29730	snoRNA	HACA	106	snoRNA	snoRNA	miRNA	snRNA	miRNA	2c
URS0000CC2ACF_37293	snoRNA	CD	61	snoRNA	snoRNA	tRNA	tRNA	miRNA	2c
URS0000C893DF_104452	snoRNA	HACA	119	miRNA	miRNA	miRNA	snoRNA	miRNA	2d
URS0000C3A7A6_109478	snoRNA	scaRNA	55	miRNA	miRNA	miRNA	snoRNA	miRNA	2d
URS000217AA8E_55149	snoRNA	CD	70	snoRNA	miRNA	snoRNA	miRNA	snoRNA	3a
URS0001BC7C27_10116	snoRNA	CD	125	unpredicted	miRNA	snoRNA	miRNA	snoRNA	3a
URS000098601B_42254	snoRNA	HACA	137	miRNA	lncRNA	snoRNA	snRNA	snoRNA	3a
URS0000C2C62F_885580	snoRNA	HACA	136	snoRNA	miRNA	snoRNA	snRNA	snoRNA	3a
URS0000E906C0_51338	snoRNA	HACA	154	snoRNA	snRNA	snoRNA	snRNA	snoRNA	3a
URS0000C6126A_8469	snoRNA	scaRNA	350	Other	snoRNA	snoRNA	lncRNA	lncRNA	3b
URS0000CCBD05_379532	snoRNA	CD	130	Other	snoRNA	snoRNA	lncRNA	lncRNA	3b
URS0000E02DD6_8508	snoRNA	HACA	222	snoRNA	snoRNA	snoRNA	snRNA	lncRNA	3b
URS0000D9D56F_1754192	snoRNA	CD	150	miRNA	snoRNA	snoRNA	miRNA	miRNA	3b
URS0000C80A20_157069	snoRNA	CD	93	miRNA	snoRNA	snoRNA	miRNA	miRNA	3b
URS00006E9AFD_9986	snoRNA	CD	71	miRNA	snoRNA	snoRNA	tRNA	miRNA	3b
URS0000925183_871575	snoRNA	HACA	155	snoRNA	snoRNA	snoRNA	rRNA	rRNA	3b
URS000071A53B_39432	snoRNA	HACA	153	snoRNA	snoRNA	snoRNA	snRNA	rRNA	3b
URS00006A6815_9595	snoRNA	scaRNA	413	snoRNA	lncRNA	snoRNA	snoRNA	lncRNA	3c
URS0000C0F5A3_1206466	snoRNA	HACA	202	snoRNA	lncRNA	snoRNA	snoRNA	lncRNA	3c
URS0000910B40_3694	snoRNA	CD	94	snoRNA	miRNA	snoRNA	snoRNA	miRNA	3c
URS0000EEDF2F_7868	snoRNA	HACA	103	miRNA	miRNA	snoRNA	snoRNA	miRNA	3c
URS0000C220AE_9823	snoRNA	CD	77	snoRNA	snoRNA	miRNA	miRNA	snoRNA	3d
URS0000BEF903_225400	snoRNA	CD	75	snoRNA	snoRNA	miRNA	miRNA	snoRNA	3d
URS0002189577_7668	snoRNA	HACA	99	miRNA	snoRNA	miRNA	miRNA	snoRNA	3d
URS0000A98A46_9978	snoRNA	CD	66	snoRNA	snoRNA	miRNA	miRNA	snoRNA	3d
URS0000675A2B_10029	snoRNA	scaRNA	111	unpredicted	snoRNA	miRNA	miRNA	snoRNA	3d
URS00006DD18A_4113	snoRNA	HACA	159	Other	snoRNA	snRNA	snRNA	snoRNA	3d
URS00006D577F_9986	snoRNA	CD	81	snoRNA	snoRNA	miRNA	snoRNA	miRNA	3f
URS0000E87383_51338	snoRNA	HACA	131	snoRNA	snoRNA	snoRNA	lncRNA	snoRNA	4a
URS000071F42D_10181	snoRNA	HACA	137	snoRNA	snoRNA	snoRNA	lncRNA	snoRNA	4a
URS0001A224F1_8630	snoRNA	CD	188	miRNA	snoRNA	snoRNA	lncRNA	snoRNA	4a
URS0000D611B8_9925	snoRNA	scaRNA	254	snoRNA	snoRNA	snoRNA	lncRNA	snoRNA	4a
URS0000BE4DCA_8839	snoRNA	HACA	155	snoRNA	snoRNA	snoRNA	lncRNA	snoRNA	4a
URS0000C13258_4903	snoRNA	HACA	249	snoRNA	snoRNA	snoRNA	lncRNA	snoRNA	4a
URS00007002D6_9986	snoRNA	scaRNA	426	unpredicted	snoRNA	snoRNA	lncRNA	snoRNA	4a
URS0000C880AA_246437	snoRNA	HACA	137	snoRNA	snoRNA	snoRNA	lncRNA	snoRNA	4a
URS0000DA49A1_1974281	snoRNA	HACA	168	Other	snoRNA	snoRNA	lncRNA	snoRNA	4a
URS000064112C_51511	snoRNA	CD	200	Other	snoRNA	snoRNA	lncRNA	snoRNA	4a
URS0000283A03_1034331	snoRNA	CD	303	snoRNA	snoRNA	snoRNA	lncRNA	snoRNA	4a
URS000063ECFF_10029	snoRNA	scaRNA	83	snoRNA	snoRNA	snoRNA	lncRNA	snoRNA	4a
URS0000C57AD4_8496	snoRNA	scaRNA	266	snoRNA	snoRNA	snoRNA	lncRNA	snoRNA	4a
URS000218534A_9771	snoRNA	CD	207	snoRNA	snoRNA	snoRNA	lncRNA	snoRNA	4a
URS00006730E8_3702	snoRNA	CD	113	Other	snoRNA	snoRNA	lncRNA	snoRNA	4a
URS0000AA949B_1868482	snoRNA	scaRNA	269	snoRNA	snoRNA	snoRNA	lncRNA	snoRNA	4a
URS0000917DCC_1868482	snoRNA	HACA	116	snoRNA	snoRNA	snoRNA	lncRNA	snoRNA	4a
URS0000DB57EF_3775	snoRNA	CD	106	snoRNA	snoRNA	snoRNA	miRNA	snoRNA	4a
URS000098F283_30538	snoRNA	CD	71	snoRNA	snoRNA	snoRNA	miRNA	snoRNA	4a
URS00006FF998_9669	snoRNA	scaRNA	143	unpredicted	snoRNA	snoRNA	miRNA	snoRNA	4a
URS0000672A86_13616	snoRNA	CD	69	snoRNA	snoRNA	snoRNA	miRNA	snoRNA	4a
URS000218477B_105023	snoRNA	CD	182	snoRNA	snoRNA	snoRNA	miRNA	snoRNA	4a
URS0000E7BDD2_1328070	snoRNA	HACA	189	snoRNA	snoRNA	snoRNA	miRNA	snoRNA	4a
URS0000C4E4B3_29729	snoRNA	CD	107	snoRNA	snoRNA	snoRNA	miRNA	snoRNA	4a
URS0000BF7091_1071380	snoRNA	HACA	198	snoRNA	snoRNA	snoRNA	rRNA	snoRNA	4a
URS000218024E_55149	snoRNA	HACA	128	snoRNA	snoRNA	snoRNA	rRNA	snoRNA	4a
URS00007040C8_10141	snoRNA	scaRNA	171	unpredicted	snoRNA	snoRNA	rRNA	snoRNA	4a
URS0000901059_80884	snoRNA	CD	261	snoRNA	snoRNA	snoRNA	rRNA	snoRNA	4a
URS0001993963_37032	snoRNA	CD	76	snoRNA	snoRNA	snoRNA	rRNA	snoRNA	4a
URS00006C7BBE_30611	snoRNA	CD	209	snoRNA	snoRNA	snoRNA	rRNA	snoRNA	4a
URS0000AAFEB3_9305	snoRNA	scaRNA	441	snoRNA	snoRNA	snoRNA	rRNA	snoRNA	4a
URS000069F94A_9365	snoRNA	scaRNA	134	unpredicted	snoRNA	snoRNA	rRNA	snoRNA	4a
URS0001BC32F3_9371	snoRNA	CD	88	Other	snoRNA	snoRNA	rRNA	snoRNA	4a
URS00006B8975_13616	snoRNA	HACA	127	unpredicted	snoRNA	snoRNA	snRNA	snoRNA	4a
URS0000C262D3_3641	snoRNA	CD	191	snoRNA	snoRNA	snoRNA	snRNA	snoRNA	4a
URS0000D935AF_4072	snoRNA	CD	107	snoRNA	snoRNA	snoRNA	snRNA	snoRNA	4a
URS0000BDE801_1026970	snoRNA	HACA	107	snoRNA	snoRNA	snoRNA	snRNA	snoRNA	4a
URS00006348CE_10116	snoRNA	HACA	158	unpredicted	snoRNA	snoRNA	snRNA	snoRNA	4a
URS0000656AF6_10116	snoRNA	HACA	130	snoRNA	snoRNA	snoRNA	snRNA	snoRNA	4a
URS00006FC7B6_59463	snoRNA	HACA	146	snoRNA	snoRNA	snoRNA	snRNA	snoRNA	4a
URS0000C31AE8_29730	snoRNA	CD	107	snoRNA	snoRNA	snoRNA	snRNA	snoRNA	4a
URS0000BC71A8_79684	snoRNA	scaRNA	140	snoRNA	snoRNA	snoRNA	snRNA	snoRNA	4a
URS0000BEE491_4565	snoRNA	CD	176	miRNA	snoRNA	snoRNA	snRNA	snoRNA	4a
URS0000D85C73_4432	snoRNA	HACA	105	miRNA	snoRNA	snoRNA	snRNA	snoRNA	4a
URS0000C75433_178035	snoRNA	CD	86	snoRNA	snoRNA	snoRNA	snRNA	snoRNA	4a
URS0000D8B28D_9365	snoRNA	CD	118	snoRNA	snoRNA	snoRNA	snRNA	snoRNA	4a
URS0000BDB137_1026970	snoRNA	HACA	148	snoRNA	snoRNA	snoRNA	snRNA	snoRNA	4a
URS0000E725E3_9999	snoRNA	scaRNA	161	snoRNA	snoRNA	snoRNA	snRNA	snoRNA	4a
URS0000C80ED5_4565	snoRNA	CD	96	snoRNA	snoRNA	snoRNA	snRNA	snoRNA	4a
URS0000BDD899_10089	snoRNA	HACA	110	miRNA	snoRNA	snoRNA	snRNA	snoRNA	4a
URS0000681544_61853	snoRNA	HACA	132	unpredicted	snoRNA	snoRNA	snRNA	snoRNA	4a
URS0000C0F725_77586	snoRNA	CD	107	snoRNA	snoRNA	snoRNA	snRNA	snoRNA	4a
URS0000C556E1_1160507	snoRNA	HACA	278	Other	snoRNA	snoRNA	snRNA	snoRNA	4a
URS0000A97CA8_9358	snoRNA	HACA	130	snoRNA	snoRNA	snoRNA	snRNA	snoRNA	4a
URS0000A831AD_10141	snoRNA	scaRNA	128	snoRNA	snoRNA	snoRNA	snRNA	snoRNA	4a
URS0000BD7853_1026970	snoRNA	HACA	134	snoRNA	snoRNA	snoRNA	snRNA	snoRNA	4a
URS0000C4E5A4_3885	snoRNA	HACA	104	snoRNA	snoRNA	snoRNA	snRNA	snoRNA	4a
URS000069A3E7_284591	snoRNA	HACA	182	snoRNA	snoRNA	snoRNA	snRNA	snoRNA	4a
URS0000D83FB0_1141098	snoRNA	HACA	164	snoRNA	snoRNA	snoRNA	snRNA	snoRNA	4a
URS0000C33854_3562	snoRNA	CD	68	snoRNA	snoRNA	snoRNA	tRNA	snoRNA	4a
URS0000146B25_570842	snoRNA	scaRNA	128	snoRNA	lncRNA	snoRNA	snoRNA	snoRNA	4b
URS0000C31C9F_113540	snoRNA	scaRNA	399	snoRNA	lncRNA	snoRNA	snoRNA	snoRNA	4b
URS000068D403_30608	snoRNA	scaRNA	225	snoRNA	lncRNA	snoRNA	snoRNA	snoRNA	4b
URS0001A1B36E_7957	snoRNA	scaRNA	332	snoRNA	lncRNA	snoRNA	snoRNA	snoRNA	4b
URS000069B53B_931890	snoRNA	HACA	389	Other	lncRNA	snoRNA	snoRNA	snoRNA	4b
URS0000CCC4B3_61853	snoRNA	CD	239	snoRNA	lncRNA	snoRNA	snoRNA	snoRNA	4b
URS0000BCA61B_885580	snoRNA	CD	204	snoRNA	lncRNA	snoRNA	snoRNA	snoRNA	4b
URS000003A853_9544	snoRNA	CD	257	snoRNA	lncRNA	snoRNA	snoRNA	snoRNA	4b
URS0000BEB2DB_498019	snoRNA	HACA	220	Other	lncRNA	snoRNA	snoRNA	snoRNA	4b
URS00006748D8_29760	snoRNA	HACA	129	snoRNA	lncRNA	snoRNA	snoRNA	snoRNA	4b
URS0001A21405_367368	snoRNA	CD	77	snoRNA	miRNA	snoRNA	snoRNA	snoRNA	4b
URS0000BD805A_230844	snoRNA	CD	79	snoRNA	miRNA	snoRNA	snoRNA	snoRNA	4b
URS0001BC24A2_1064592	snoRNA	HACA	204	Other	miRNA	snoRNA	snoRNA	snoRNA	4b
URS0000C48DA9_5454	snoRNA	CD	94	snoRNA	miRNA	snoRNA	snoRNA	snoRNA	4b
URS00021873CA_50452	snoRNA	CD	107	rRNA	miRNA	snoRNA	snoRNA	snoRNA	4b
URS0000E792D0_230844	snoRNA	CD	130	snoRNA	miRNA	snoRNA	snoRNA	snoRNA	4b
URS0000C4D54D_1173701	snoRNA	HACA	149	miRNA	snRNA	snoRNA	snoRNA	snoRNA	4b
URS0000686CEC_1071378	snoRNA	CD	97	snoRNA	snoRNA	snoRNA	snoRNA	miRNA	4c
URS0000AA0704_9371	snoRNA	HACA	122	Other	snoRNA	snoRNA	snoRNA	miRNA	4c
URS00009DC339_3821	snoRNA	CD	87	miRNA	snoRNA	snoRNA	snoRNA	miRNA	4c
URS00006B8A70_39432	snoRNA	scaRNA	111	unpredicted	snoRNA	snoRNA	snoRNA	miRNA	4c
URS0000D7527A_4528	snoRNA	CD	82	snoRNA	snoRNA	snoRNA	snoRNA	miRNA	4c
URS0000D97E2B_56857	snoRNA	CD	111	snoRNA	snoRNA	snoRNA	snoRNA	miRNA	4c
URS0000D7F93C_4232	snoRNA	CD	101	snoRNA	snoRNA	snoRNA	snoRNA	miRNA	4c
URS0000C570CE_214687	snoRNA	HACA	131	snoRNA	snoRNA	snoRNA	snoRNA	miRNA	4c
URS00006E0376_644358	snoRNA	CD	88	Other	snoRNA	snoRNA	snoRNA	miRNA	4c
URS0000C67309_6188	snoRNA	CD	96	miRNA	snoRNA	snoRNA	snoRNA	miRNA	4c
URS0000E86145_75864	snoRNA	CD	68	miRNA	snoRNA	snoRNA	snoRNA	miRNA	4c
URS000069D9CA_59463	snoRNA	scaRNA	88	miRNA	snoRNA	snoRNA	snoRNA	miRNA	4c
URS0000716A9A_9986	snoRNA	CD	67	snoRNA	snoRNA	snoRNA	snoRNA	miRNA	4c
URS0000C58E60_4155	snoRNA	HACA	106	miRNA	snoRNA	snoRNA	snoRNA	miRNA	4c
URS000063DE52_10181	snoRNA	CD	132	snoRNA	snoRNA	snoRNA	snoRNA	miRNA	4c
URS0001962D36_210632	snoRNA	scaRNA	131	snoRNA	snoRNA	snoRNA	snoRNA	miRNA	4c
URS0000D93093_4072	snoRNA	CD	106	snoRNA	snoRNA	miRNA	snoRNA	snoRNA	4d
URS0000A947CE_10020	snoRNA	scaRNA	128	snoRNA	snoRNA	miRNA	snoRNA	snoRNA	4d
URS000095BD11_483514	snoRNA	HACA	186	snoRNA	snoRNA	snRNA	snoRNA	snoRNA	4d
URS00021E9E8E_158383	tRNA	tRNA_base	1120	unpredicted	lncRNA	lncRNA	lncRNA	lncRNA	1a
URS00021942FF_158383	tRNA	tRNA_base	1204	unpredicted	lncRNA	lncRNA	lncRNA	lncRNA	1a
URS0001BD2402_9606	tRNA	tRNA_base	1772	unpredicted	lncRNA	lncRNA	lncRNA	lncRNA	1a
URS00020C1479_317549	tRNA	tRNA_base	229	Other	lncRNA	lncRNA	rRNA	snoRNA	1b
URS0000C6765B_9209	tRNA	tRNA_base	93	miRNA	miRNA	tRNA	miRNA	miRNA	2a
URS00001F6905_6239	tRNA	tRNA_base	125	Other	lncRNA	snRNA	tRNA	miRNA	2d
URS0000BFCDC3_1420907	tRNA	tRNA_base	222	Other	lncRNA	tRNA	lncRNA	tRNA	3a
URS0000CB43FD_9764	tRNA	tRNA_base	73	tRNA	tRNA	miRNA	snoRNA	tRNA	3d
URS0000A0412B_1296123	tRNA	tRNA_base	119	tRNA	tRNA	snoRNA	snoRNA	tRNA	3d
URS0000448CE5_1318459	tRNA	tRNA_base	75	Other	tRNA	miRNA	tRNA	miRNA	3f
URS0000B8FF16_4999	tRNA	tRNA_base	80	miRNA	tRNA	snoRNA	tRNA	miRNA	3f
URS0000D9FFC1_7160	tRNA	tRNA_base	72	tRNA	tRNA	tRNA	miRNA	tRNA	4a
URS00000313BA_1415773	tRNA	tRNA_base	76	tRNA	tRNA	tRNA	rRNA	tRNA	4a
URS00022262B5_708437	tRNA	tRNA_base	107	tRNA	tRNA	tRNA	rRNA	tRNA	4a
URS0000726B0D_43179	tRNA	tRNA_base	63	tRNA	tRNA	tRNA	snRNA	tRNA	4a
URS0000C2EC00_57421	tRNA	tRNA_base	71	tRNA	tRNA	tRNA	snoRNA	tRNA	4a
URS0000717C50_7897	tRNA	tRNA_base	72	tRNA	tRNA	tRNA	snoRNA	tRNA	4a
URS0000261C07_1027292	tRNA	tRNA_base	75	tRNA	tRNA	tRNA	snoRNA	tRNA	4a
URS0000720F5D_9785	tRNA	tRNA_base	71	tRNA	tRNA	tRNA	snoRNA	tRNA	4a
URS0000B69CAA_106004	tRNA	tRNA_base	114	tRNA	tRNA	tRNA	snoRNA	tRNA	4a
URS0000C0192D_6313	tRNA	tRNA_base	72	tRNA	tRNA	tRNA	snoRNA	tRNA	4a
URS0000C16666_1214573	tRNA	tRNA_base	105	miRNA	tRNA	tRNA	snoRNA	tRNA	4a
URS00002B0EC7_979982	tRNA	tRNA_base	76	tRNA	miRNA	tRNA	tRNA	tRNA	4b
URS0000C8B47F_1042878	tRNA	tRNA_base	65	tRNA	miRNA	tRNA	tRNA	tRNA	4b
URS00002382FB_387	tRNA	tRNA_base	1151	unpredicted	rRNA	tRNA	tRNA	tRNA	4b
URS0002191E1D_679940	tRNA	tRNA_base	71	tRNA	tRNA	tRNA	tRNA	miRNA	4c
URS00019C3AE3_3870	tRNA	tRNA_base	85	miRNA	tRNA	tRNA	tRNA	miRNA	4c
URS0000D8101B_568069	tRNA	tRNA_base	86	miRNA	tRNA	snoRNA	tRNA	tRNA	4d
