# Supplementary material for: MncR: Late Integration Machine Learning Model for Classification of ncRNA Classes Using Sequence and Structural Encoding
Source: Int J Mol Sci. 2023 May 17;24(10):8884. doi: 10.3390/ijms24108884 (PMC10218863; doi:10.3390/ijms24108884)
Supplement: Supplementary file 1 [file ijms-24-08884-s001.zip › SUPPL_TABLE2.ods]

## Sheet: nrc_testset_false_predictions
	rna_type	rfam_label	length	mncr_pred	ncrdense_pred_rnatypes
RF00838_AEKS01001053_1_45779-45887	miRNA	miRNA	109	snoRNA	snoRNA
RF00906_ADDN01000279_1_530125-530249	miRNA	miRNA	125	miRNA	other
RF00951_AGTP01025074_1_10401-10452	miRNA	miRNA	52	miRNA	other
RF00951_ABRN01383187_1_10462-10513	miRNA	miRNA	52	miRNA	other
RF00951_AAWR02002692_1_40662-40713	miRNA	miRNA	52	miRNA	other
RF00994_ACFV01097722_1_7339-7274	miRNA	miRNA	66	miRNA	other
RF00994_AAWR02020653_1_124318-124253	miRNA	miRNA	66	miRNA	other
RF01912_BABH01036994_1_27909-28027	miRNA	miRNA	119	miRNA	other
RF01912_BABH01025750_1_6357-6239	miRNA	miRNA	119	miRNA	other
RF01926_AFPP01032859_1_18518-18409	miRNA	miRNA	110	miRNA	other
RF02002_AADA01123923_1_11894-11785	miRNA	miRNA	110	miRNA	other
RF02025_ABLF02007146_1_7262-7173	miRNA	miRNA	90	miRNA	other
RF00695_ABIM01009168_1_9183-9310	miRNA	miRNA	128	miRNA	rRNA
RF00906_AAMC01118987_1_24927-25078	miRNA	miRNA	152	miRNA	rRNA
RF00251_CU464026_9_41700-41632	miRNA	miRNA	69	miRNA	snoRNA
RF00643_BABP01005408_1_59566-59665	miRNA	miRNA	100	miRNA	snoRNA
RF00643_AFSA01125614_1_326-220	miRNA	miRNA	107	miRNA	snoRNA
RF00645_FN595991_1_1281338-1281220	miRNA	miRNA	119	miRNA	snoRNA
RF00647_ACUP01002195_1_10183-10288	miRNA	miRNA	106	miRNA	snoRNA
RF00679_AERX01005057_2_121913-121816	miRNA	miRNA	98	miRNA	snoRNA
RF00736_ABRT010161523_1_661-582	miRNA	miRNA	80	miRNA	snoRNA
RF00906_ADDN01000473_1_89827-89962	miRNA	miRNA	136	miRNA	snoRNA
RF00906_AEOM01128244_1_4064-3937	miRNA	miRNA	128	miRNA	snoRNA
RF00906_ADDN01001047_1_613450-613315	miRNA	miRNA	136	miRNA	snoRNA
RF00994_AAGU03031745_1_14354-14285	miRNA	miRNA	70	miRNA	snoRNA
RF00994_ACFV01007306_1_23557-23625	miRNA	miRNA	69	miRNA	snoRNA
RF00994_ADFV01037003_1_2195-2260	miRNA	miRNA	66	miRNA	snoRNA
RF00994_AAWR02032723_1_161379-161314	miRNA	miRNA	66	miRNA	snoRNA
RF00994_AEYP01065889_1_2930-3002	miRNA	miRNA	73	miRNA	snoRNA
RF00994_AEYP01006385_1_765-830	miRNA	miRNA	66	miRNA	snoRNA
RF00994_AGCE01119872_1_6488-6423	miRNA	miRNA	66	miRNA	snoRNA
RF00994_CABD02263130_1_10024-10089	miRNA	miRNA	66	miRNA	snoRNA
RF00994_ABVD01412220_1_1408-1474	miRNA	miRNA	67	miRNA	snoRNA
RF00994_AGCE01000865_1_1532-1467	miRNA	miRNA	66	miRNA	snoRNA
RF00994_DAAA02042990_1_79083-79148	miRNA	miRNA	66	miRNA	snoRNA
RF00994_ABRQ01569627_1_530-595	miRNA	miRNA	66	miRNA	snoRNA
RF00994_AEYP01029196_1_6369-6304	miRNA	miRNA	66	miRNA	snoRNA
RF00994_ABDC01129329_1_996-1063	miRNA	miRNA	68	miRNA	snoRNA
RF00994_ADFV01050286_1_41800-41866	miRNA	miRNA	67	miRNA	snoRNA
RF00994_AAQR03022442_1_25065-25130	miRNA	miRNA	66	miRNA	snoRNA
RF00994_CAEC01232748_1_355-290	miRNA	miRNA	66	miRNA	snoRNA
RF00994_ACTA01116223_1_29213-29277	miRNA	miRNA	65	miRNA	snoRNA
RF00994_AEYP01045868_1_1522-1456	miRNA	miRNA	67	miRNA	snoRNA
RF00994_AAQR03092289_1_11216-11150	miRNA	miRNA	67	miRNA	snoRNA
RF00994_AADA01022519_1_6994-7059	miRNA	miRNA	66	miRNA	snoRNA
RF00994_AGCE01009846_1_17627-17562	miRNA	miRNA	66	miRNA	snoRNA
RF00994_AEKP01106174_1_17086-17021	miRNA	miRNA	66	miRNA	snoRNA
RF00994_AAEX03012764_1_117914-117979	miRNA	miRNA	66	miRNA	snoRNA
RF01912_BABH01021019_1_5334-5451	miRNA	miRNA	118	miRNA	snoRNA
RF01915_ABKE01003698_1_3164-3283	miRNA	miRNA	120	miRNA	snoRNA
RF01917_AC155889_2_18157-18053	miRNA	miRNA	105	miRNA	snoRNA
RF00782_AARH01012642_1_3592-3732	miRNA	miRNA	141	other	miRNA
RF00782_AARH01006766_1_11342-11476	miRNA	miRNA	135	snoRNA	miRNA
RF00782_AARH01002946_1_28625-28480	miRNA	miRNA	146	snoRNA	miRNA
RF00782_AARH01006056_1_104141-104276	miRNA	miRNA	136	snoRNA	miRNA
RF00876_AAGV020642809_1_1437-1350	miRNA	miRNA	88	snoRNA	miRNA
RF02002_ACFV01089955_1_2654-2542	miRNA	miRNA	113	snoRNA	miRNA
RF02518_AFPQ01006450_1_37538-37422	miRNA	miRNA	117	snoRNA	miRNA
RF00001_AFSA01194409_1_116-243	rRNA	5S_rRNA	128	miRNA	miRNA
RF00002_GU306259_1_1-68	rRNA	5_8S_rRNA	68	miRNA	miRNA
RF00002_AB490760_1_265-314	rRNA	5_8S_rRNA	50	miRNA	other
RF00001_AACY021592979_1_796-856	rRNA	5S_rRNA	61	tRNA	other
RF00001_AGQN01163968_1_1149-1029	rRNA	5S_rRNA	121	rRNA	miRNA
RF00001_AFYH01128094_1_8745-8850	rRNA	5S_rRNA	106	rRNA	miRNA
RF00002_AY026738_1_400-289	rRNA	5_8S_rRNA	112	rRNA	miRNA
RF00002_AF136051_1_489-578	rRNA	5_8S_rRNA	90	rRNA	other
RF00001_ABIM01036514_1_2566-2669	rRNA	5S_rRNA	104	miRNA	rRNA
RF00001_AACT01035718_1_93-1	rRNA	5S_rRNA	93	miRNA	rRNA
RF00001_ADFJ01002314_1_5498-5367	rRNA	5S_rRNA	132	miRNA	rRNA
RF00001_AARH01003141_1_53262-53164	rRNA	5S_rRNA	99	miRNA	rRNA
RF00002_AY335848_1_502-411	rRNA	5_8S_rRNA	92	miRNA	rRNA
RF00002_DQ915475_1_1-110	rRNA	5_8S_rRNA	110	miRNA	rRNA
RF00002_DQ153533_1_310-508	rRNA	5_8S_rRNA	199	other	rRNA
RF00001_ACYM01037574_1_174-55	rRNA	5S_rRNA	120	snoRNA	rRNA
RF00002_EU556328_1_1-106	rRNA	5_8S_rRNA	106	snoRNA	rRNA
RF01537_AF545070_1_422-492	snoRNA	HACA-box	71	miRNA	miRNA
RF01537_Z50171_1_232-303	snoRNA	HACA-box	72	miRNA	miRNA
RF01271_AEAV01000040_1_2779-2272	snoRNA	HACA-box	508	other	other
RF01271_CP002502_1_169600-169157	snoRNA	HACA-box	444	other	other
RF00108_AAQR03178255_1_31526-31436	snoRNA	CD-box	91	snoRNA	miRNA
RF00108_ACIV011729335_1_1-77	snoRNA	CD-box	77	snoRNA	miRNA
RF00330_ACUP01005527_1_121198-121282	snoRNA	CD-box	85	snoRNA	miRNA
RF01201_CP000497_1_358606-358529	snoRNA	CD-box	78	snoRNA	miRNA
RF01244_HE576753_1_811635-811454	snoRNA	CD-box	182	snoRNA	miRNA
RF00334_ABRR01437115_1_1649-1521	snoRNA	HACA-box	129	snoRNA	miRNA
RF00393_AFSB01129230_1_5797-5692	snoRNA	HACA-box	106	snoRNA	miRNA
RF00560_AANN01053159_1_1584-1496	snoRNA	HACA-box	89	snoRNA	miRNA
RF00599_AALT01433960_1_741-619	snoRNA	HACA-box	123	snoRNA	miRNA
RF01262_AADM01000111_1_62348-62509	snoRNA	HACA-box	162	snoRNA	miRNA
RF01431_BABL01029110_1_97-175	snoRNA	HACA-box	79	snoRNA	miRNA
RF00601_AAEX03017912_1_42167-42267	snoRNA	scaRNA	101	snoRNA	miRNA
RF00054_EU943601_1_438-518	snoRNA	CD-box	81	snoRNA	other
RF01281_AARH01000500_1_83108-83191	snoRNA	CD-box	84	snoRNA	other
RF00545_AASW01025365_1_2331-2193	snoRNA	HACA-box	139	snoRNA	other
RF00568_AGTP01030779_1_71647-71755	snoRNA	HACA-box	109	snoRNA	other
RF01206_AFSQ01010462_1_4340-4437	snoRNA	HACA-box	98	snoRNA	other
RF01422_AENI01006253_1_25009-25099	snoRNA	CD-box	91	miRNA	snoRNA
RF00218_AGCE01133922_1_3251-3148	snoRNA	CD-box	104	other	snoRNA
RF01275_CP002920_1_1529315-1529256	snoRNA	CD-box	60	tRNA	snoRNA
RF00005_CP000448_1_2592775-2592663	tRNA	tRNA	113	tRNA	miRNA
RF00005_AAGU03082541_1_2467-2409	tRNA	tRNA	59	tRNA	other
RF00005_AEWC01023341_1_19397-19324	tRNA	tRNA	74	tRNA	snoRNA
RF00005_ABLF02014067_1_11435-11365	tRNA	tRNA	71	miRNA	tRNA
RF00005_AY359242_1_53442-53358	tRNA	tRNA	85	snoRNA	tRNA
RF00005_BX842593_8_31001-31083	tRNA	tRNA	83	snoRNA	tRNA
RF00005_AAKN02028539_1_7090-7148	tRNA	tRNA	59	snoRNA	tRNA
